# Supplementary material for: Effect of salt stress on different tiller positions in rice and the regulatory effect of prohexadione calcium
Source: PeerJ. 2024 Dec 27;12:e18357. doi: 10.7717/peerj.18357 (PMC11684399; doi:10.7717/peerj.18357)
Supplement: Supplemental Information 1 — The data show that the morphological and physiological characteristics of leaves and stems at each tiller position of the two rice varieties varied under different treatments. [file peerj-12-18357-s001.xlsx]

## Sheet: Figure 1
index	treatments
		7d	average number	standard error	significance	14d	average number	standard error	significance	21d	average number	standard error	significance	28d	average number	standard error	significance	35d	average number	standard error	significance
tiller number	XCK		2	0	ab		2.667	0.3333	a		3	0	a		3.333	0.3333	ab		3.667	0.3333	a
	XS		1.333	0.3333	b		1.667	0.3333	b		1.667	0.3333	b		2.333	0.3333	b		2.333	0.3333	b
	XPro-Ca		2.333	0.3333	a		3	0	a		2.333	0.3333	ab		3.667	0.3333	a		3.667	0.3333	a
	XPro-Ca+S		2	0	ab		2.333	0.3333	ab		2.667	0.3333	a		2.667	0.3333	ab		3.667	0.3333	a
	ZCK		2	0	ab		2.333	0.3333	ab		3.333	0.3333	ab		2.667	0.3333	bc		2.667	0.3333	b
	ZS		1.333	0.3333	b		1.667	0.3333	b		2.333	0.3333	b		2	0	c		2.333	0.3333	b
	ZPro-Ca		2.667	0.3333	a		3.667	0.6667	a		3.667	0.3333	a		3.667	0.3333	a		4	0.5774	ab
	ZPro-Ca+S		2.333	0.3333	ab		3	0.5774	ab		3.333	0.3333	ab		3.333	0.3333	ab		4.667	0.6667	a
the number of leaves in main stems	XCK		8	0	a		11	0	bc		11.667	0.3333	a		13.333	0.3333	b		16.333	0.3333	b
	XS		8	0	a		10	0	c		11	0	a		11.333	0.3333	a		16	0	b
	XPro-Ca		8.333	0.3333	a		11.667	0.6667	ab		11.667	0.3333	a		14	0	a		17.667	0.3333	a
	XPro-Ca+S		8.333	0.3333	a		12.333	0.3333	a		11.333	0.3333	a		14	0.5774	a		17	0.5774	ab
	ZCK		9.667	0.3333	bc		12.667	0.3333	a		12	0	a		13.667	0.3333	b		16.333	0.3333	a
	ZS		9	0	c		10	0.5774	b		10.667	0.3333	b		12	0	c		15	0.5774	b
	ZPro-Ca		10.667	0.3333	a		12.667	0.3333	a		12.667	0.3333	a		14.667	0.3333	a		17.333	0.3333	a
	ZPro-Ca+S		10	0	ab		11	0	b		12.333	0.3333	a		14.333	0.3333	ab		17.667	0.3333	a

## Sheet: Figure 2
index	Tillering position	treatments
			7d	average number	standard error	significance	14d	average number	standard error	significance	21d	average number	standard error	significance	28d	average number	standard error	significance	35d	average number	standard error	significance
SOD activity of rice leaves/ U∙g-1FW	0	XCK		423.873	7.23552	b		564.532	20.0369	b		655.45	11.5379	b		668.993	4.8881	c		549.943	20.2903	b
		XS		459.15	3.39374	a		740.957	46.7874	a		796.432	14.2161	a		776.204	22.1907	b		587.798	12.1755	ab
		XPro-Ca		450.617	12.4089	ab		742.061	33.8742	a		812.541	22.2636	a		723.388	23.2792	b		608.752	13.9062	ab
		XPro-Ca+S		473.292	9.52693	a		839.208	2.05843	a		841.983	24.0727	a		919.391	4.87923	a		656.152	33.0369	a
		ZCK		489.572	19.5513	a		884.985	10.2819	a		775.827	9.87904	c		788.375	12.4719	d		645.134	8.10778	b
		ZS		436.385	8.07221	b		798.194	21.0069	b		956.24	24.7419	a		980.093	10.0675	a		729.016	9.38678	a
		ZPro-Ca		476.566	2.19641	a		673.617	31.2968	c		688.677	8.44357	d		844.499	6.41186	c		617.44	15.9414	b
		ZPro-Ca+S		457.169	9.27108	ab		798.914	10.76	b		890.866	20.7407	b		891.489	2.83293	b		710.16	24.4319	a
	I	XCK		496.894	6.46533	a		656.338	5.53426	ab		704.417	8.6971	b		685.552	16.1591	c		668.477	26.4266	a
		XS		434.543	7.29732	b		594.698	32.2227	b		758.592	25.8521	ab		839.246	15.8464	b		615.476	13.9253	ab
		XPro-Ca		451.993	13.5188	b		664.042	17.9281	ab		706.624	17.4827	b		834.18	7.24988	b		609.559	9.59532	b
		XPro-Ca+S		487.599	8.03076	a		724.206	33.4524	a		780.278	16.52	a		925.218	21.857	a		627.359	7.9387	ab
		ZCK		487.386	18.4305	a		581.883	25.0864	b		684.86	15.5918	b		764.41	16.7388	b		664.449	3.9205	ab
		ZS		416.813	0.42449	b		624.804	18.0657	b		615.786	17.7563	b		780.979	23.9601	b		619.437	32.1039	b
		ZPro-Ca		378.538	10.0312	c		720.319	15.546	a		680.811	20.8325	b		775.434	22.9572	b		615.251	25.408	b
		ZPro-Ca+S		434.087	2.59436	b		763.384	15.867	a		808.841	41.1356	a		870.795	4.61978	a		702.887	15.5329	a
	II	XCK		408.856	7.42441	c		778.455	10.9662	a		814.113	12.435	a		810.535	29.9667	b		586.301	12.1626	b
		XS		500.889	7.71378	a		748.985	32.1418	a		816.274	23.3068	a		839.688	47.0997	ab		608.037	25.7014	ab
		XPro-Ca		426.093	9.3	bc		647.375	8.86946	b		736.564	11.045	b		917.531	11.1804	a		612.53	23.3621	ab
		XPro-Ca+S		448.599	17.8403	b		723.45	25.5251	a		733.271	11.8976	b		937.417	12.8403	a		669.625	23.7709	a
		ZCK		451.204	19.192	a		742.817	24.6493	a		760.553	3.57613	a		945.179	20.0822	a		729.616	33.0534	a
		ZS		370.618	6.13895	b		719.239	8.10769	ab		680.377	7.98113	b		821.277	19.0405	b		494.555	39.9549	c
		ZPro-Ca		406.408	29.6437	ab		680.025	13.2305	b		677.932	8.30986	b		813.956	9.08892	b		672.271	32.0383	ab
		ZPro-Ca+S		436.606	2.29147	a		703.519	15.926	ab		759.97	38.5497	a		863.652	12.9344	b		612.539	20.2914	b

## Sheet: Figure 3
index	Tillering position	treatments
			7d	average number	standard error	significance	14d	average number	standard error	significance	21d	average number	standard error	significance	28d	average number	standard error	significance	35d	average number	standard error	significance
SOD activity of rice stems/ U∙g-1FW	0	XCK		524.958	3.34197	b		330.7	48.1038	ab		554.178	9.88335	b		609.006	5.65625	a		626.388	20.3565	a
		XS		467.798	4.7512	c		229.645	5.88103	b		514.824	14.0006	b		540.262	3.14553	c		467.118	37.4272	bc
		XPro-Ca		524.224	3.30681	b		295.286	35.4972	ab		652.131	7.64977	a		575.165	4.62847	b		533.101	26.5972	b
		XPro-Ca+S		556.992	2.36874	a		380.937	21.0602	a		650.928	22.2712	a		614.059	4.24404	a		435.524	17.5539	c
		ZCK		541.191	1.70998	a		478.895	17.571	a		719.239	24.5209	a		651.038	11.6494	ab		619.197	50.7914	a
		ZS		544.206	5.75935	a		503.367	25.1379	a		622.818	18.8584	b		641.716	10.0152	b		534.233	32.5546	ab
		ZPro-Ca		524.17	8.72043	a		426.19	12.7077	a		673.396	19.2246	ab		666.681	3.97629	ab		476.404	23.5212	b
		ZPro-Ca+S		570.692	31.3568	a		461.781	31.6841	a		635.583	15.272	b		682.952	10.3051	a		576.758	4.01789	ab
	I	XCK		555.668	13.8992	b		339.85	9.23472	b		606.613	7.48809	bc		682.318	10.0573	a		554.309	21.9934	a
		XS		499.597	3.84473	c		326.914	34.801	b		556.597	8.98941	c		612.422	10.7815	b		492.911	8.92967	a
		XPro-Ca		591.282	17.5348	ab		299.903	46.4099	b		643.016	23.4612	ab		606.367	3.21511	b		534.807	22.2505	a
		XPro-Ca+S		602.804	0.95026	a		496.59	46.0044	a		704.12	33.5625	a		668.409	18.1941	a		524.195	41.0891	a
		ZCK		535.475	23.6171	a		386.574	33.4673	b		588.899	42.5168	b		590.154	5.19108	a		572.538	15.0753	a
		ZS		428.177	13.5758	b		413.978	42.7579	b		537.817	22.1318	b		560.764	11.6061	a		273.625	20.543	c
		ZPro-Ca		533.363	33.2886	a		398.692	28.9933	b		585.865	9.85038	b		602.071	20.2223	a		376.601	33.205	b
		ZPro-Ca+S		519.079	6.2241	a		539.564	6.05943	a		723.315	21.2903	a		599.516	2.76871	a		540.92	42.3008	a
	II	XCK		578.081	5.74548	a		591.51	16.1579	b		654.7	5.80361	a		648.851	21.2904	ab		436.618	35.8055	a
		XS		505.638	0.556	b		400.116	19.4319	d		642.389	51.5663	a		615.637	9.28743	b		489.738	30.6876	a
		XPro-Ca		514.284	8.70629	b		470.789	14.974	c		617.468	4.91263	a		687.015	26.1561	a		532.899	17.9526	a
		XPro-Ca+S		457.539	6.28436	c		894.297	11.0927	a		659.63	31.9495	a		641.366	8.77416	ab		534.489	35.1161	a
		ZCK		487.69	1.46358	a		568.261	16.8243	a		664.009	38.7271	a		635.499	3.60744	a		538.763	21.385	ab
		ZS		429.248	1.93077	b		431.957	31.7896	b		514.371	31.4146	b		601.65	9.10112	b		485.642	17.6786	b
		ZPro-Ca		478.045	12.3563	a		398.051	22.8472	b		595.213	23.2758	ab		642.169	8.65259	a		470.245	14.1712	b
		ZPro-Ca+S		476.703	2.50923	a		446.104	50.8496	b		651.232	15.0008	a		660.574	11.8034	a		571.832	33.6867	a

## Sheet: Figure 4
index	Tillering position	treatments
			7d	average number	standard error	significance	14d	average number	standard error	significance	21d	average number	standard error	significance	28d	average number	standard error	significance	35d	average number	standard error	significance
CAT activity of rice leaves/ U∙g-1FW	0	XCK		749.823	27.1183	ab		1001.82	3.72194	a		1061.6	10.7967	a		1099.91	11.0865	a		969.467	9.11969	c
		XS		677.6	34.972	b		946.663	28.2657	ab		965.69	30.8454	b		1005.07	15.1346	bc		1203.29	6.77535	a
		XPro-Ca		779.69	12.3957	a		934.49	14.7377	ab		965.643	18.959	b		1026.18	26.0036	b		1046.35	6.82431	b
		XPro-Ca+S		718.267	14.37	ab		890.09	32.5565	b		995.153	14.3158	b		954.353	9.44489	c		1072.53	16.7409	b
		ZCK		745.557	20.9514	ab		929.643	11.0389	b		1102.09	5.78105	a		1047.64	24.3973	a		1079.87	34.1331	a
		ZS		759.38	2.13013	a		912.09	7.15545	b		997.513	54.526	b		869.6	25.3701	b		1059.2	15.7823	a
		ZPro-Ca		693.777	10.6764	bc		1060	26.9966	a		1051.56	5.87179	ab		1033.42	11.8484	a		1050.53	19.1239	a
		ZPro-Ca+S		674.313	25.1024	c		968.533	21.9749	b		1059.11	23.5979	ab		1018.93	35.1391	a		1008.53	6.82481	a
	I	XCK		1036.47	37.6414	a		1153.8	25.5126	b		1292.8	6.63425	ab		1176.07	23.8734	b		1194.8	39.8663	a
		XS		1030	46.3622	a		1239.67	26.1463	a		1256.93	14.3501	b		1236	24.8869	ab		1188.33	14.8074	a
		XPro-Ca		980.2	13.7322	a		1231.6	5.37029	a		1344.33	21.5209	a		1298.53	19.5552	a		1265.8	16.7726	a
		XPro-Ca+S		977.867	15.3564	a		1270.33	15.7752	a		1296.87	19.1838	ab		1216.2	23.0307	b		1215.67	10.4514	a
		ZCK		1044.27	28.1151	c		1207.8	49.6344	b		1334.67	4.93333	a		1256.67	34.989	a		1299.87	5.7182	a
		ZS		1258.67	26.3862	b		1216.87	11.1489	b		1269.93	9.10482	b		1207.6	18.7471	a		1188.73	31.4334	b
		ZPro-Ca		1398.2	37.3936	a		1325	7.27461	a		1315.33	2.8103	a		1268.53	22.9112	a		1294.8	47.3028	a
		ZPro-Ca+S		1189.67	23.4473	b		1245.73	20.8884	ab		1312.2	8.16823	a		1247.2	15.4277	a		1273.4	24.0103	ab
	II	XCK		725.822	13.2212	b		973.333	27.0509	a		1039.73	17.5298	a		1065.56	8.7586	a		1080.44	15.2192	a
		XS		492.444	13.865	c		904.578	30.3493	b		1034.58	8.58813	a		1005.91	26.07	ab		1012.22	7.72311	b
		XPro-Ca		872.889	8.77752	a		1025.78	7.27057	a		1010	6.36146	a		975.911	26.6785	b		1052.84	13.2142	ab
		XPro-Ca+S		727.644	2.71548	b		866.222	5.24501	b		1025.87	23.3788	a		1007.33	30.7197	ab		1063.82	14.9463	a
		ZCK		903.689	55.5113	ab		915.2	29.7994	a		1046.49	18.1611	a		1062.84	15.3654	a		1056.93	11.0291	ab
		ZS		852.889	10.8889	bc		903.778	68.0891	a		1038.31	10.2939	a		1052.93	19.4915	a		1031.33	7.9692	bc
		ZPro-Ca		959.378	9.71973	a		967.289	12.5627	a		1039.51	15.798	a		1037.78	24.3366	a		1014	11.4793	c
		ZPro-Ca+S		791.2	17.0849	c		1036.58	36.0583	a		998.8	14.3685	a		1042.62	11.0825	a		1069.78	9.99921	a

## Sheet: Figure 5
index	Tillering position	treatments
			7d	average number	standard error	significance	14d	average number	standard error	significance	21d	average number	standard error	significance	28d	average number	standard error	significance	35d	average number	standard error	significance
CAT activity of rice stems/ U∙g-1FW	0	XCK		454.578	5.16073	ab		321.022	8.60571	a		250.533	5.46883	b		201.467	12.2015	b		205.511	8.31468	c
		XS		408.489	7.71697	c		238.844	1.44905	c		235.867	2.04106	c		159.289	6.05179	c		230.089	3.81058	b
		XPro-Ca		455.822	2.8652	a		298	9.13731	b		203.867	4.31432	d		135.156	0.84795	d		179.644	0.83029	d
		XPro-Ca+S		431.867	10.0101	b		290.044	3.13861	b		288	4.53921	a		306.089	2.00936	a		320.178	2.78018	a
		ZCK		423.6	4.95551	b		270.489	3.81524	b		261.333	7.25902	b		191.333	2.95246	b		308.133	1.55682	a
		ZS		428.756	6.41865	b		252.444	1.60432	c		281.467	8.5925	b		196.356	2.86106	b		225.111	2.22755	c
		ZPro-Ca		371.2	4.16191	c		246.8	6.38934	c		274.756	3.62406	b		144.267	3.58515	c		182.8	0.73434	d
		ZPro-Ca+S		454.667	4.96447	a		303.911	2.53021	a		302.844	4.46904	a		275.067	2.37143	a		296.4	0.83267	b
	I	XCK		446.622	6.83535	c		214.089	5.62552	c		243.867	1.07772	a		183.6	1.1547	a		164.311	3.33985	b
		XS		445.733	14.9957	c		270.844	1.37993	b		236.311	10.8633	a		134.044	1.01641	c		142.889	1.87669	c
		XPro-Ca		570.489	1.04515	a		227.778	6.47014	c		229.244	3.12157	a		116.267	2.64771	d		199.778	1.92655	a
		XPro-Ca+S		498.622	5.57897	b		352.089	3.8508	a		238.267	1.5396	a		144.889	2.80775	b		108.489	3.76048	d
		ZCK		341.511	2.02552	b		235.644	10.3252	a		290.489	3.75733	b		135.6	0.61584	c		196.978	4.87432	b
		ZS		330.8	1.2812	c		250.222	6.79055	a		280.978	1.74921	b		141.156	3.09871	c		107.467	2.39382	c
		ZPro-Ca		391.644	5.71124	a		243.111	4.09974	a		235.156	4.93233	c		184.756	0.7863	a		96.5778	1.84806	c
		ZPro-Ca+S		392.622	1.16577	a		259.2	7.98257	a		306.756	3.71291	a		151.556	2.9708	b		210.178	4.29458	a
	II	XCK		493.733	0.81104	b		227.244	4.60938	c		247.067	3.80019	a		219.378	2.33788	a		171.956	0.90212	b
		XS		414.267	2.5543	c		179.244	3.54471	d		225.6	1.89659	b		134.489	1.87669	c		195.867	5.40014	a
		XPro-Ca		489.733	1.79051	b		259.956	3.46096	b		170.844	3.24262	c		195.911	1.03375	b		174.133	3.67171	b
		XPro-Ca+S		673.244	1.60062	a		298.044	7.10653	a		248.356	2.35052	a		220.756	5.3146	a		197.689	5.51702	a
		ZCK		395.378	6.71817	b		308.756	6.8962	a		262.222	4.64715	b		165.111	7.22356	a		188.489	2.6177	b
		ZS		354.844	2.43473	c		234.133	16.7528	b		228.356	8.4833	c		103.156	1.77277	b		133.2	4.33487	c
		ZPro-Ca		347.156	3.11872	c		282.933	1.63843	a		228.933	1.81516	c		159.511	2.84132	a		97.4222	1.46936	d
		ZPro-Ca+S		445.867	5.77248	a		251.867	1.74356	b		316.311	3.34162	a		152.667	2.41109	a		219.956	2.53723	a

## Sheet: Figure 6
index	Tillering position	treatments
			7d	average number	standard error	significance	14d	average number	standard error	significance	21d	average number	standard error	significance	28d	average number	standard error	significance	35d	average number	standard error	significance
POD activity of rice leaves/ U∙g-1FW	0	XCK		312.943	6.53691	a		154.527	1.75895	a		244.027	0.52537	c		230.89	13.0193	b		65.6467	0.829	b
		XS		304.1	3.72886	a		133.397	1.14619	c		255.623	7.44093	bc		173.877	3.26252	c		71.3333	0.57693	a
		XPro-Ca		321.433	9.84949	a		137.723	2.16718	c		307.047	3.32382	a		209.253	9.90112	b		70.3933	0.70238	a
		XPro-Ca+S		323.663	0.72467	a		147.37	1.12	b		261.71	4.15607	b		263.927	2.17906	a		60.66	1.02481	c
		ZCK		445.773	1.48306	b		210.403	3.50117	ab		340.277	4.96523	d		293.55	12.55	c		99.7733	1.31516	c
		ZS		387.74	11.0161	c		196.62	5.44763	b		396.93	4.71621	b		535.21	10.7514	a		154.74	1.01402	a
		ZPro-Ca		456.307	4.41257	b		168.95	4.53468	c		366.64	9.32519	c		325.377	3.72345	b		99.9033	1.88483	c
		ZPro-Ca+S		490.987	3.68703	a		212.877	4.55143	a		445.797	6.42953	a		512.853	1.86735	a		138.617	2.3695	b
	I	XCK		344.687	1.50025	a		155.94	2.77794	a		254.68	6.51666	b		207.403	2.51221	c		88.5267	1.55733	a
		XS		307.41	6.30912	b		142.183	2.59349	b		267.727	8.90928	ab		258.013	2.90476	a		71.0867	0.68957	c
		XPro-Ca		335.47	2.52537	a		148.867	1.78379	ab		291.113	8.39107	a		238.983	5.14504	b		79.1633	1.74178	b
		XPro-Ca+S		346.893	4.44948	a		142.823	2.44577	b		277.037	2.69626	ab		267.64	3.78036	a		79.3267	3.17994	b
		ZCK		346.297	5.32649	b		198.71	1.593	b		374.567	4.84386	a		303.407	4.29714	d		102.71	0.06245	b
		ZS		321.37	14.6236	bc		177.433	9.50948	c		353.177	9.09266	a		538.403	6.04299	b		171.103	7.95112	a
		ZPro-Ca		300.65	3.68367	c		191.657	3.53638	bc		369.243	11.3131	a		389.783	7.29854	c		114.94	0.74639	b
		ZPro-Ca+S		401.173	17.2017	a		223.697	3.00835	a		370.263	1.20405	a		599.523	8.54349	a		165.11	1.54029	a
	II	XCK		398.777	3.6731	b		214.223	4.56567	a		326.173	6.80824	ab		321.837	39.3363	b		147.22	4.53593	a
		XS		383.427	11.8372	b		180.02	1.2329	c		314.123	2.66597	b		290.49	3.95571	b		81.3333	1.26366	c
		XPro-Ca		338.577	3.88096	c		178.22	3.45004	c		343.533	2.12222	a		411.97	11.1784	a		90.0667	0.73372	b
		XPro-Ca+S		474.457	4.85401	a		198.313	1.70607	b		316.74	8.97809	b		358.06	6.08207	ab		94.5167	1.34209	b
		ZCK		523.26	13.0899	a		228.977	2.34175	a		419.497	6.24304	b		527.623	4.05932	b		150.233	4.72588	a
		ZS		386.633	17.6336	c		212.45	4.56205	b		399.917	9.12258	bc		445.11	10.683	c		129.877	2.46921	b
		ZPro-Ca		474.413	2.48283	b		183.673	2.61543	c		392.99	6.26012	c		412.217	12.105	d		101.847	0.67056	c
		ZPro-Ca+S		455.287	2.69541	b		238.213	6.26015	a		463.907	3.80179	a		599.587	2.14357	a		142.627	2.2921	a

## Sheet: Figure 7
index	Tillering position	treatments
			7d	average number	standard error	significance	14d	average number	standard error	significance	21d	average number	standard error	significance	28d	average number	standard error	significance	35d	average number	standard error	significance
POD activity of rice stems/ U∙g-1FW	0	XCK		208.153	8.7674	c		71.4133	3.66136	c		164.047	1.91848	bc		179.443	1.42272	d		109.53	2.46082	b
		XS		226.573	3.63218	bc		103.463	2.3272	b		172.287	3.18224	ab		221.137	4.05897	c		116.583	0.82238	b
		XPro-Ca		253.56	3.94194	a		110.893	4.00895	ab		158.687	0.51966	c		292.087	4.8649	b		97.54	2.02615	c
		XPro-Ca+S		239.923	7.75327	ab		129.727	11.3658	a		183.373	5.79841	a		334.78	8.99195	a		129.597	2.94501	a
		ZCK		249.8	4.22994	c		117.197	2.98314	c		194.913	13.323	c		378.017	2.09237	a		200.697	3.94289	a
		ZS		278.21	1.62525	b		125.863	1.58637	ab		211.387	11.5513	bc		308.117	5.68174	b		130.183	1.15851	d
		ZPro-Ca		249.713	3.01966	c		123.837	1.65687	b		234.653	7.93084	b		201.213	1.71167	c		156.05	2.66929	c
		ZPro-Ca+S		302.76	2.50096	a		131.857	0.5958	a		281.837	3.59599	a		379.863	5.55238	a		165.237	0.48036	b
	I	XCK		259	0.84327	b		107.45	2.89545	b		257.55	1.11791	a		301.68	1.78584	b		175.97	1.31721	a
		XS		225.55	4.9399	c		101.527	4.00494	b		207.57	6.77965	b		266.867	2.57178	c		95.1367	1.77131	c
		XPro-Ca		345.693	10.2246	a		111.733	4.19941	b		246.127	8.08431	a		240.16	7.4782	d		109.487	1.20911	b
		XPro-Ca+S		264.33	6.04246	b		125.96	4.74035	a		224.347	0.9864	b		328.383	2.1721	a		95.31	1.26858	c
		ZCK		267.573	4.21466	b		122.897	3.7653	b		293.393	3.32929	b		292.103	1.16396	d		168.29	3.08549	a
		ZS		239.03	8.88897	c		119.65	6.18806	b		266.98	2.15616	c		304.103	2.02768	c		59.3667	0.77335	d
		ZPro-Ca		292.31	7.61339	a		114.86	1.92922	b		304.947	4.52973	ab		335.903	4.00626	b		91.22	0.93016	c
		ZPro-Ca+S		307.44	7.76651	a		135.793	2.40476	a		308.077	4.95955	a		367.3	5.62692	a		117.563	1.62694	b
	II	XCK		270.33	10.4141	b		149.09	1.87687	a		300.61	1.25369	a		379.587	5.59924	b		142.087	3.96695	b
		XS		210.88	7.66655	c		110.453	6.40086	c		237.73	6.12458	b		354.073	0.92744	c		138.557	3.88049	b
		XPro-Ca		310.52	14.9118	a		139.563	2.60837	ab		287.17	0.68017	a		396.91	10.7356	ab		184.767	4.05284	a
		XPro-Ca+S		276.863	3.03333	b		131.697	5.80988	b		303.42	7.76997	a		405.437	5.91916	a		174.117	5.13983	a
		ZCK		272.537	2.59322	a		162.963	5.04564	a		317.917	5.4795	b		372.44	1.93655	a		163.53	0.12897	a
		ZS		255.883	6.26493	a		144.463	2.71419	b		309.393	5.63446	a		331.53	2.72148	d		121.54	2.36796	b
		ZPro-Ca		183.307	6.23899	c		152.15	2.2743	ab		329.407	0.80768	b		357.983	0.54407	b		98.7067	5.88528	c
		ZPro-Ca+S		266.497	3.28926	ab		156.597	1.66314	a		412.18	16.5568	a		348.44	0.96504	c		129.42	2.03517	b

## Sheet: Figure 8
index	Tillering position	treatments
			7d	average number	standard error	significance	14d	average number	standard error	significance	21d	average number	standard error	significance	28d	average number	standard error	significance	35d	average number	standard error	significance
APX activity of rice leaves/ U∙g-1FW	0	XCK		1170.03	162.847	a		626.05	10.6836	b		492.85	38.2035	b		461.5	99.8509	b		325.225	37.6336	a
		XS		594.7	59.2781	b		682.55	24.6264	b		582.65	24.5808	ab		649.9	81.2191	ab		614.962	12.4924	b
		XPro-Ca		619.675	151.845	b		642.675	20.7234	b		677.375	67.5158	ab		629.4	24.3715	ab		391.375	70.8137	a
		XPro-Ca+S		708.425	118.558	b		740.425	8.93543	a		762.85	90.2687	a		775.775	76.8053	a		851.475	77.5959	a
		ZCK		920.1	52.1564	a		872.3	14.788	a		575.75	84.4986	a		671.45	22.1158	b		633.8	8.33382	a
		ZS		402.65	94.293	b		808.5	23.254	a		602.125	22.3765	a		780.875	47.5795	ab		688	22.4875	a
		ZPro-Ca		762.025	177.218	a		521.7	33.49	b		346.975	47.8671	b		945.975	101.825	a		559.625	26.5395	a
		ZPro-Ca+S		633.575	30.3518	ab		911.95	60.8578	a		651.375	46.3716	a		789.475	83.5307	ab		740.475	132.769	a
	I	XCK		717.65	47.5645	a		580.125	78.8769	b		653.1	65.3371	a		695.575	62.9838	a		559.883	64.0006	a
		XS		625.825	93.5552	a		416.05	32.228	c		541.612	72.508	a		376.4	19.1317	b		256.1	22.9302	b
		XPro-Ca		748.125	8.80295	a		586.975	23.1189	b		467.025	51.2457	a		531.35	25.1517	ab		687.525	137.311	a
		XPro-Ca+S		664.325	38.7118	a		747.675	43.5078	a		675.425	84.8101	a		671.2	95.1048	a		431.375	29.1134	ab
		ZCK		879.7	28.0088	ab		834.05	22.1771	a		431.7	51.1886	b		811.525	25.4078	b		657.375	71.3432	a
		ZS		688.6	105.845	b		682.95	45.3437	b		417.1	15.389	b		405.425	30.073	a		479.425	50.2224	a
		ZPro-Ca		769.125	37.7587	b		854.975	20.108	a		478.325	34.7698	ab		778.9	33.5415	a		539.675	41.6166	a
		ZPro-Ca+S		1013.75	63.5701	a		935.7	25.5723	a		770.55	167.777	a		824.925	31.4776	a		570.6	117.809	a
	II	XCK		798.8	109.878	ab		832.525	22.0443	a		706.65	22.6556	a		700.875	81.7717	b		449.6	48.5191	b
		XS		753.925	51.2925	ab		541.975	28.1556	b		622.65	29.0014	a		469.15	29.4821	b		473.7	56.4709	b
		XPro-Ca		930.85	17.9586	a		554.325	54.4655	b		779.475	141.054	a		902.95	72.2642	a		458.775	76.575	b
		XPro-Ca+S		626.575	37.3517	b		671.375	51.0881	b		759.925	92.7628	a		717.55	124.717	ab		664.65	18.0999	a
		ZCK		1012.75	18.1114	a		831.75	49.6646	ab		580.225	25.2174	a		791.425	16.9905	ab		432.25	58.9807	b
		ZS		675.25	74.7008	b		666.325	41.9389	b		564.3	52.2232	a		763.35	57.1617	ab		548.975	65.4517	b
		ZPro-Ca		899.5	43.5677	a		840.5	97.8808	ab		679.325	63.1313	a		594.4	65.8807	b		783.938	13.0553	a
		ZPro-Ca+S		1026	58.4078	a		894.85	18.2988	a		565.15	97.0647	a		944.25	132.688	a		507.9	87.4432	b

## Sheet: Figure 9
index	Tillering position	treatments
			7d	average number	standard error	significance	14d	average number	standard error	significance	21d	average number	standard error	significance	28d	average number	standard error	significance	35d	average number	standard error	significance
APX activity of rice stems/ U∙g-1FW	0	XCK		570	75.2584	a		251.925	23.5055	a		265.2	10.9552	a		439.2	35.7737	a		278.45	37.0859	a
		XS		379.9	48.0298	b		215.45	15.5633	a		233.05	74.618	a		263.6	47.3149	a		222.575	60.4519	a
		XPro-Ca		248.625	8.87708	b		274.025	28.2308	a		154.65	4.07032	a		334.5	12.0378	a		374.925	17.1438	a
		XPro-Ca+S		712.8	37.1525	a		240.075	11.7215	a		344.45	79.2761	a		399.65	102.587	a		294.525	110.397	a
		ZCK		649.4	1.63764	a		243.35	17.5669	b		373.975	41.7161	a		469.675	35.425	a		408.575	57.2231	a
		ZS		432.4	66.0072	b		236.9	7.83757	b		293.825	35.6236	a		378.475	46.4523	a		268.525	47.6906	a
		ZPro-Ca		391.225	39.4685	b		230.8	6.16908	b		366.55	70.7948	a		541.125	75.3962	a		452.9	108.301	a
		ZPro-Ca+S		536.35	40.7754	ab		316.6	6.14303	a		364.925	40.9824	a		420.05	99.0455	a		353.325	59.1027	a
	I	XCK		384.05	58.7487	a		236.9	7.83757	b		411.175	7.49454	a		428.475	63.7136	a		372.225	45.4357	a
		XS		309.05	48.1307	a		230.8	6.16908	b		284.25	83.2893	a		257.775	79.9188	a		187.35	36.6936	b
		XPro-Ca		317.325	74.0149	a		243.35	17.5669	b		315.9	53.782	a		470.375	82.8618	a		275.775	30.9699	ab
		XPro-Ca+S		342.725	25.978	a		316.6	6.14303	a		338.75	83.6344	a		523.75	94.9857	a		188.95	39.0172	b
		ZCK		352.75	6.41449	b		302.4	27.447	a		415.175	37.7894	a		258.85	17.8764	a		548.45	94.7367	a
		ZS		334.1	43.2887	b		278.5	33.7893	a		232.95	52.5136	b		222.85	42.2659	a		196.95	51.4822	b
		ZPro-Ca		543.8	2.83097	a		191.525	22.6885	a		287.95	21.0945	ab		362.95	81.8218	a		285.025	37.9775	b
		ZPro-Ca+S		411	41.5692	b		308.4	60.0888	a		292.9	48.8058	ab		411.125	95.4588	a		392.325	75.3762	ab
	II	XCK		632.175	27.8677	a		346.8	30.9237	a		395.35	105.402	a		515.325	28.2684	a		529.275	9.33773	a
		XS		394.675	53.7749	b		190.625	7.18832	b		310.475	62.2696	a		268.725	75.0576	b		195.65	27.2534	b
		XPro-Ca		479.2	61.6499	b		279.725	19.7641	ab		283.2	66.3294	a		456.45	59.3358	ab		371.6	111.44	ab
		XPro-Ca+S		428.575	17.7941	b		256.75	48.0838	ab		323.225	54.8995	a		309.025	71.9615	ab		205.9	21.9063	b
		ZCK		461.5	10.5154	b		325.55	15.8125	a		234.975	16.7143	a		556.25	19.2885	a		347.6	73.5588	a
		ZS		362.975	54.0243	b		250.75	13.2898	ab		175.475	29.0579	a		378.375	15.7397	b		226.075	7.68111	a
		ZPro-Ca		541.3	77.7463	ab		230.2	15.2184	b		365.4	81.5652	a		381.45	72.2152	b		332.8	133.459	a
		ZPro-Ca+S		665.1	68.2618	a		335.1	47.6702	a		288.125	81.5749	a		623.7	23.8187	a		267.875	34.8931	a

## Sheet: Figure 10
index	Tillering position	treatments
			7d	average number	standard error	significance	14d	average number	standard error	significance	21d	average number	standard error	significance	28d	average number	standard error	significance	35d	average number	standard error	significance
MDA content of rice leaves/ mmol∙g-1FW	0	XCK		11.0297	0.2095	bc		8.3518	0.1164	b		8.2661	0.01972	c		6.3807	0.04371	d		4.8221	0.04112	c
		XS		12.4681	0.46058	a		9.5121	0.15509	a		10.6994	0.09167	a		9.5809	0.10046	a		7.4555	0.14528	a
		XPro-Ca		11.6854	0.34854	ab		9.1562	0.08423	a		8.6463	0.12781	b		7.5919	0.03866	c		5.0191	0.1387	c
		XPro-Ca+S		10.1742	0.22125	c		9.4616	0.05779	a		7.7475	0.11072	d		8.5675	0.26422	b		5.6268	0.03087	b
		ZCK		10.1846	0.51042	d		8.9602	0.06815	b		6.492	0.24721	d		6.0822	0.07149	d		4.3912	0.03825	d
		ZS		14.8807	0.12593	a		9.912	0.42347	a		11.91	0.18028	a		13.8629	0.63583	a		6.474	0.06824	a
		ZPro-Ca		11.7511	0.19668	c		7.3015	0.04732	d		7.9574	0.07536	c		8.0913	0.06314	c		5.2021	0.03183	c
		ZPro-Ca+S		12.996	0.19966	b		8.0807	0.13298	c		8.9315	0.23412	b		10.5889	0.02687	b		5.9139	0.01318	b
	I	XCK		12.5732	0.15792	a		8.5436	0.05833	b		7.9251	0.07188	c		5.5257	0.1217	d		5.3839	0.04987	bc
		XS		12.6462	0.25901	a		9.1856	0.04153	a		9.8483	0.13707	a		9.9131	0.02638	a		6.7833	0.17994	a
		XPro-Ca		12.5376	0.25156	a		6.9165	0.0788	c		8.2959	0.0617	b		7.386	0.11739	c		5.1353	0.08203	c
		XPro-Ca+S		9.2564	0.03113	b		6.8884	0.07643	c		7.7987	0.00323	c		7.9007	0.09303	b		5.6136	0.08811	b
		ZCK		8.03398	0.472696	b		9.02917	0.0697128	b		8.17622	0.105779	b		8.42465	0.0050494	d		4.18263	0.0375622	c
		ZS		9.69628	0.04472	a		10.226	0.0842041	a		9.57424	0.237376	a		12.9338	0.401069	a		7.35883	0.393037	a
		ZPro-Ca		6.67539	0.0427971	c		9.06738	0.107458	b		9.34131	0.0770078	a		9.19315	0.0338525	c		5.25455	0.0114633	b
		ZPro-Ca+S		9.46429	0.0931667	a		9.17779	0.423043	b		7.26953	0.0528821	c		11.2437	0.0301433	b		5.21589	0.0407542	b
	II	XCK		8.91055	0.174415	c		7.98567	0.0389075	b		8.41302	0.025796	b		7.07929	0.110254	b		5.84232	0.0129096	ab
		XS		10.9474	0.0375622	a		9.26256	0.0640958	a		9.06491	0.0584649	a		9.88171	0.389507	a		6.03673	0.237919	a
		XPro-Ca		9.82236	0.0491854	b		7.62231	0.125708	b		6.8706	0.108892	c		7.02402	0.153187	b		4.98111	0.0541933	c
		XPro-Ca+S		7.11795	0.043495	d		8.89658	0.26773	a		9.05714	0.0490368	a		7.2192	0.0048126	b		5.5336	0.0048126	b
		ZCK		8.41257	0.126589	b		9.03819	0.0516664	a		8.60977	0.0413067	b		8.69611	0.024369	b		4.41386	0.199294	d
		ZS		11.0316	0.0770909	a		9.58183	0.183279	a		10.366	0.343802	a		10.2081	0.119638	a		7.26813	0.157624	a
		ZPro-Ca		7.47324	0.0397039	d		8.38599	0.183347	b		8.26845	0.100069	b		8.34399	0.384124	b		5.40999	0.0418135	c
		ZPro-Ca+S		8.06115	0.0470533	c		9.4289	0.24662	a		9.94583	0.0793482	a		9.55529	0.043495	a		6.37663	0.0355501	b

[truncated: 8 more sheets: Figure 11, Figure 12 , Figure 13, Figure 15, Figure 16, Table 1, Table 2, Table 3]
